# Supplementary material for: Improving the thermostability and modulating the inulin profile of inulosucrase through rational glycine-to-proline substitution
Source: Royal Society of Chemistry journal article supplement (doi:10.1039/d3ra06896j), 2024-01-01
Supplement: d3ra06896j1.pdf [file d3ra06896j1.pdf]

## Supporting information

# Improving the thermostability and modulating the inulin profile of inulosucrase through rational glycine-to-proline substitution

Thanapon Charoenwongpaiboon <sup>a\*</sup>, Nawapat Sommanat <sup>a</sup>, Karan Wangpaiboon <sup>b</sup>, Manatsanan

Puangpathanachai <sup>b</sup>, Piamsook Pongsawadi <sup>b</sup> and Rath Pichyangkura <sup>b</sup>

<sup>a</sup> Department of Chemistry, Faculty of Science, Silpakorn University, Nakhon Pathom, 73000, Thailand

<sup>b</sup> Department of Biochemistry, Faculty of Science, Chulalongkorn University, Bangkok, 10330, Thailand

\* Corresponding author: charoenwongpaib\_t@su.ac.th (TC)

**Table S1** Oligonucleotide primer for site-directed mutagenesis

| Primer name   | Sequence (5' - 3')                    |
|---------------|---------------------------------------|
| G217P_F       | GCTGCAAAGTCTCCGACACAAATG              |
| G217P_R       | CATTTGTGTCGGAGACTTTGCAGC              |
| G298P_F       | CGCAATGATGCCGATTCCAAACC               |
| G298P_R       | GGTTTGGAATCGGCATCATTGCG               |
| G330P_F       | GGTCCAATTTTTCCGTATAATTCTACCG          |
| G330P_R       | CGGTAGAATTATACGGAAAAATTGGACC          |
| G416P_F       | CTACTAACAAACCGGCCGATAATATTGC          |
| G416P_R       | GCAATATTATCGGCCGTTTGTAGTAG            |
| G450P_F       | GAAAATTATCAACCGGAGGACCAAATTTATAACTG   |
| G450P_R       | CAGTTATAAATTTGGTCCTCCGGTTGATAATTTTC   |
| G624P_F       | CTAATAGAAATCCGGTAGCGGGTAAAG           |
| G624P_R       | CTTTACCCGCTACCGGATTTCTATTAG           |
| G627P_F       | GGAGTAGCGCCGAAAGGAATGG                |
| G627P_R       | CCATTCCTTCGGCGCTACTCC                 |
| G629P_F       | GCTGCAAAGTCTCCGACACAAATG              |
| G629P_R       | CATTTGTGTCGGAGACTTTGCAGC              |
| F_NdeI_InuS   | GGTACATATGCTAGAACGCAAGGAACATAAAAAAATG |
| R_699HIS_InuS | GGTGCTCGAGTTTAAATCCATAACCAATTAAG      |

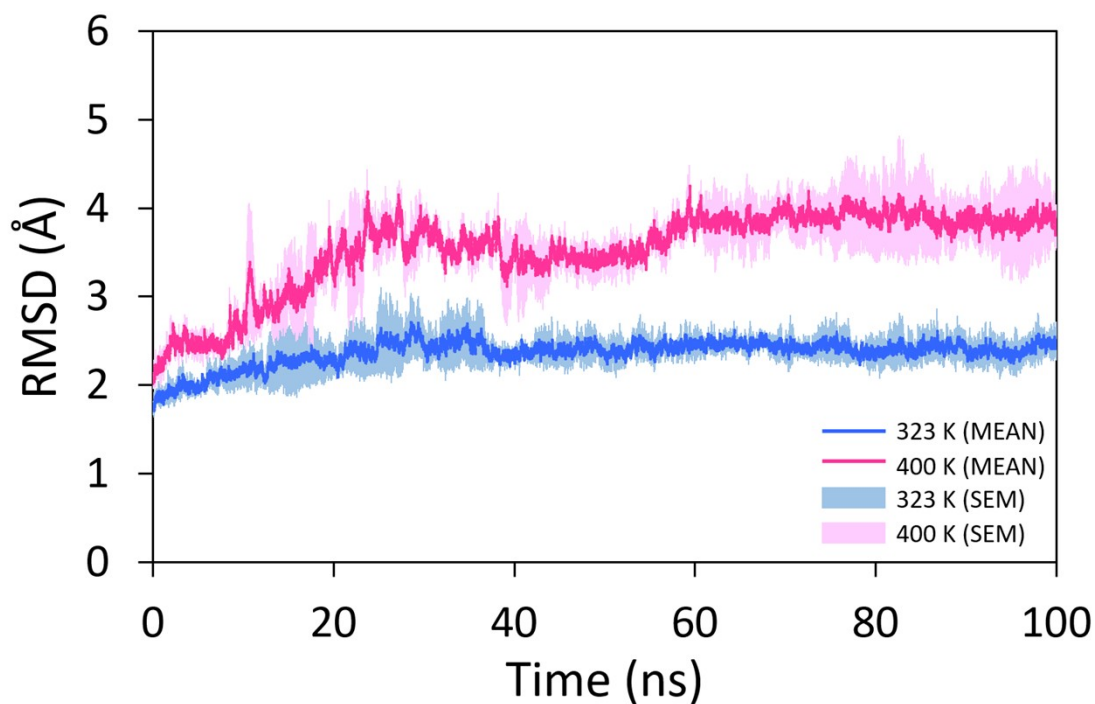

**Fig S1** RMSD plot of wild-type LrInu at 323K and 400K.

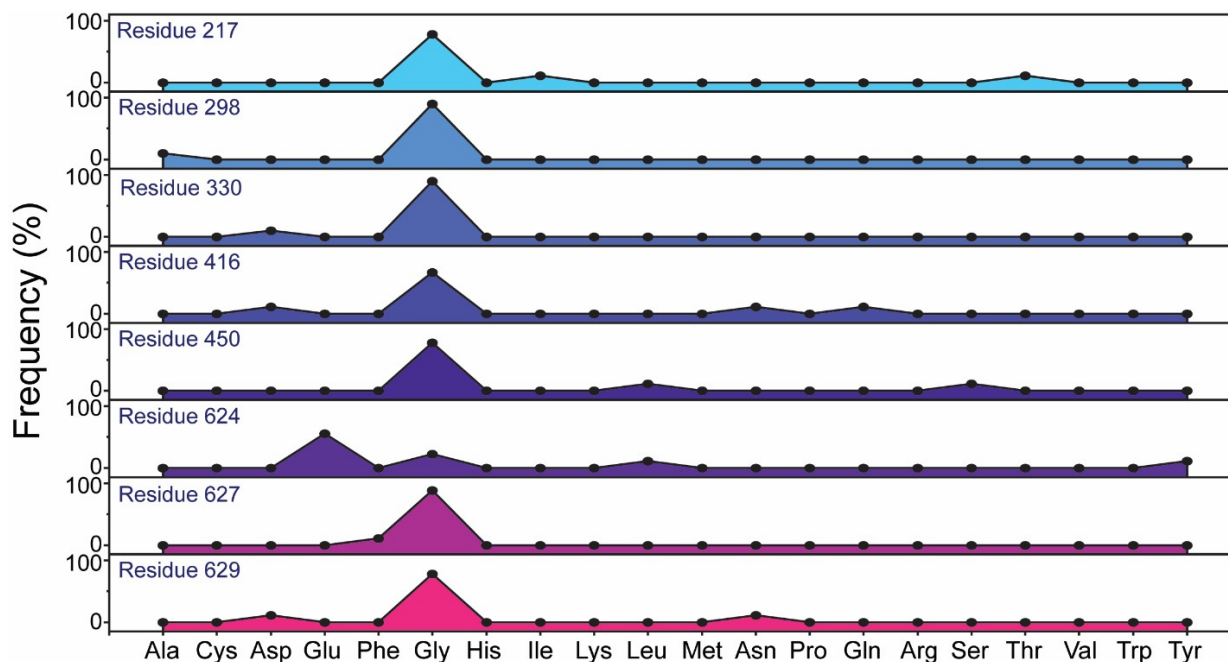

**Fig. S2** Conservation analysis of flexible glycine residues of LrInu. The frequency of each amino acid is obtained from a multiple sequence alignment of the 58 inulosucrase sequences.

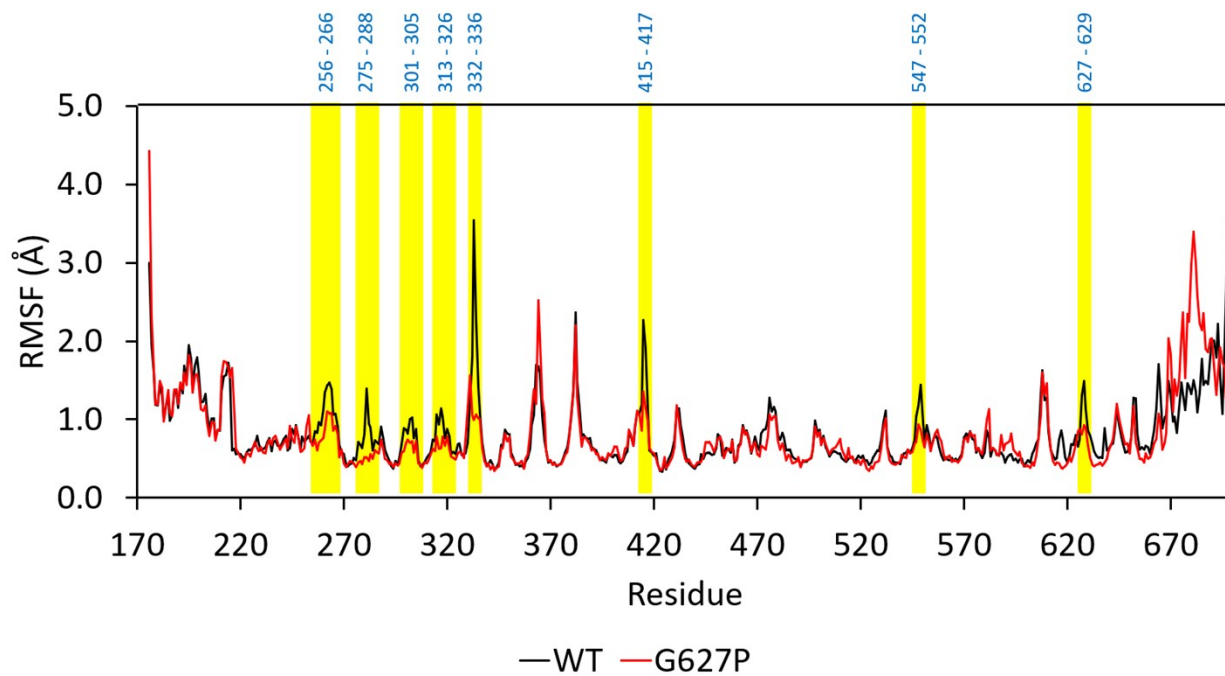

**Fig. S3** RMSF plot of WT and G627P mutant Lrlnu.
